# Supplementary material for: Preclinical Evaluation of [18F]LCATD as a PET Tracer to Study Drug-Drug Interactions Caused by Inhibition of Hepatic Transporters
Source: Contrast Media Mol Imaging. 2018 Jul 30;2018:3064751. doi: 10.1155/2018/3064751 (PMC6091370; doi:10.1155/2018/3064751)
Supplement: Supplementary Materials — The supporting information includes radio-HPLC analysis of bile extracts (Figure S1); the experimentalprotocol for the radiosynthesis of [ 18 F]LCATD,module configuration (.doc file) (Figure S2); HPLC coinjectionwith LCATD (Figure S3); and visualisation of ROIs (Figure S4). Rotating ROIs are visualised in the movie file Video_ROIs.wmv. [file 3064751.f1.zip]

Archive with 4 entries (4 files):
- Video_ROIs_CMMI_2306300.wmv
- GA_REVISED_CMMI_2306295.pptx
- Supporting Information_CMMI_2306298.docx
- Supporting Information_CMMI_2306299.pdf
